# Supplementary material for: Eccentric Cycling Training Improves Erythrocyte Antioxidant and Oxygen Releasing Capacity Associated with Enhanced Anaerobic Glycolysis and Intracellular Acidosis
Source: MDPI journal article supplement (doi:10.3390/antiox10020285), 2021-02-13

**Figure S1**

The scheme of testing oxygen release capacity in erythrocytes by using high-resolution respirometry. **(A)** Hypoxia chamber, and **(B)** normoxia chamber. The red line indicated the oxygen oxygen release/uptake velocity, the blue line indicated the oxygen pressure.

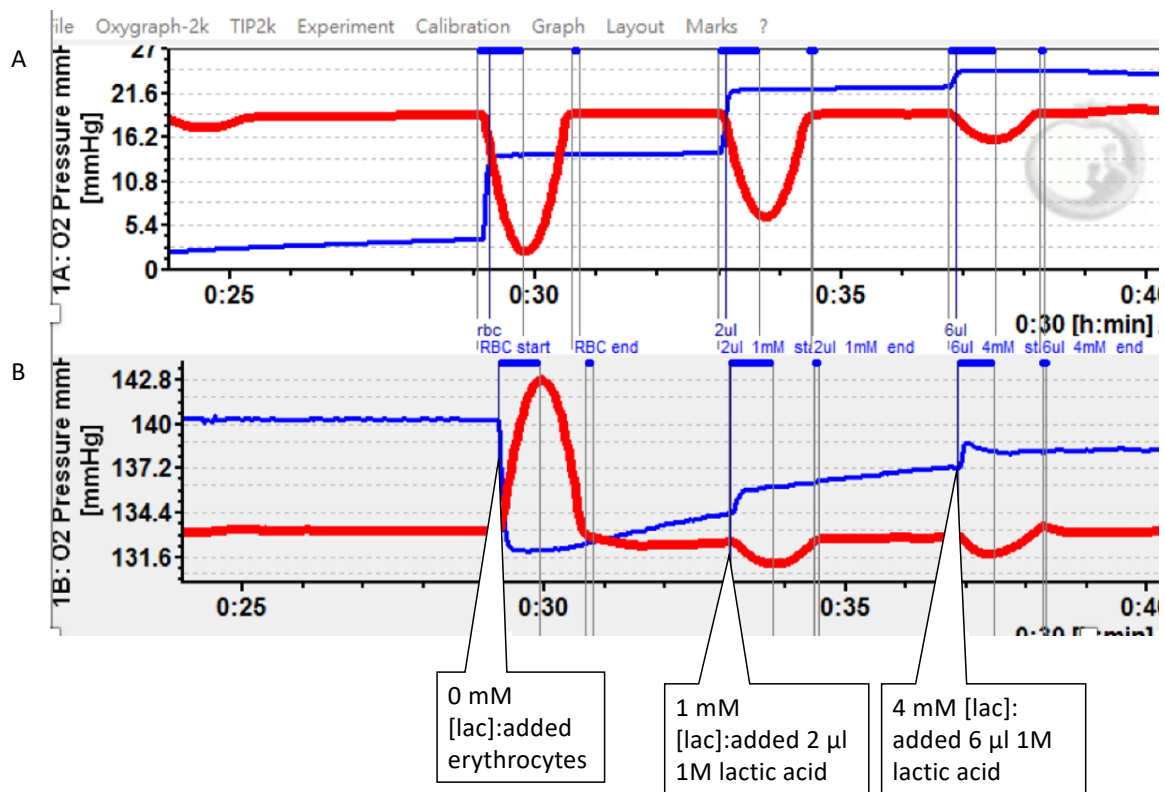

Supplement: s1 [file s1]
